# Supplementary material
Source: Royal Society of Chemistry journal article supplement (doi:10.1039/d6an00514d)
Supplement: d6an00514d1.pdf [file d6an00514d1.pdf]

## Supplementary material for

### **Thermodesorption Kinetics of Nikethamide on Oxidized Tungsten Surfaces**

M.M. Nazarov<sup>a\*</sup>, I.M. Saydumarov<sup>b</sup>, A. Sh. Radjabov<sup>a</sup>, Sh.Dj. Akhunov<sup>a</sup>, Sh.M. Akhmedov<sup>a</sup>,  
S.S.Iskhakova<sup>a</sup>, D.T.Usmanov<sup>a\*\*</sup>

<sup>a</sup>Arifov Institute of Ion-Plasma and Laser Technologies, Uzbekistan Academy of Sciences, Durmon Yoli street 33, 100125, Tashkent Uzbekistan

<sup>b</sup>Tashkent State Transport University, Tashkent, Uzbekistan

\*Correspondence to: [maxmanazarnazarov1996@gmail.com](mailto:maxmanazarnazarov1996@gmail.com)

\*\*Correspondence to: [usmanov@iplt.uz](mailto:usmanov@iplt.uz)

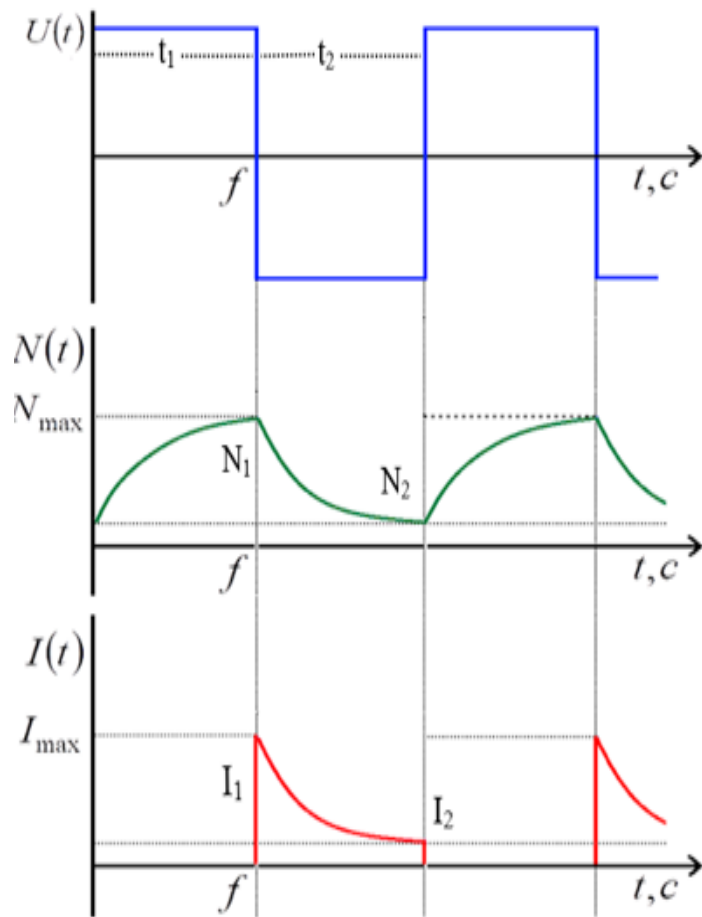

Supplementary Figure 1. Schematic diagram of the voltage modulation method: (a) modulating voltage waveform; (b) time dependence of the concentration of adsorbed particles on the emitter surface; (c) waveform of the current pulses of desorbed ions.

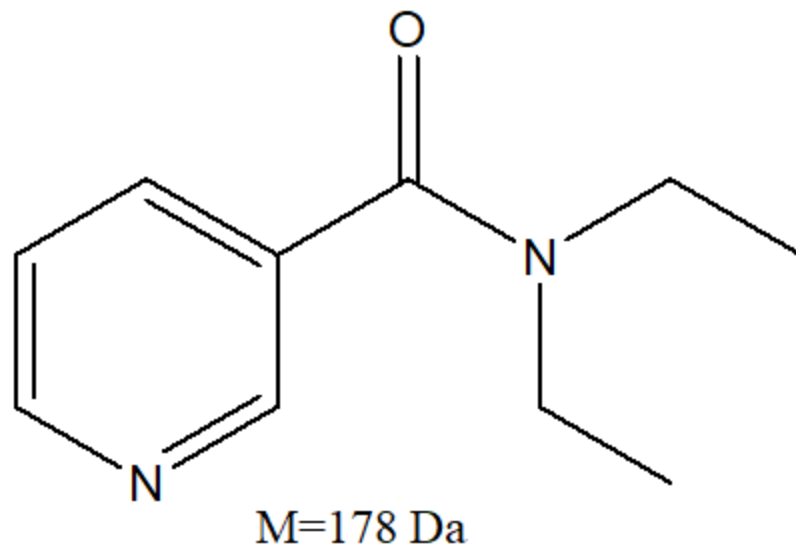

Supplementary Figure 2. Structure of Nikethamide ( $C_{10}H_{14}N_2O$ ).

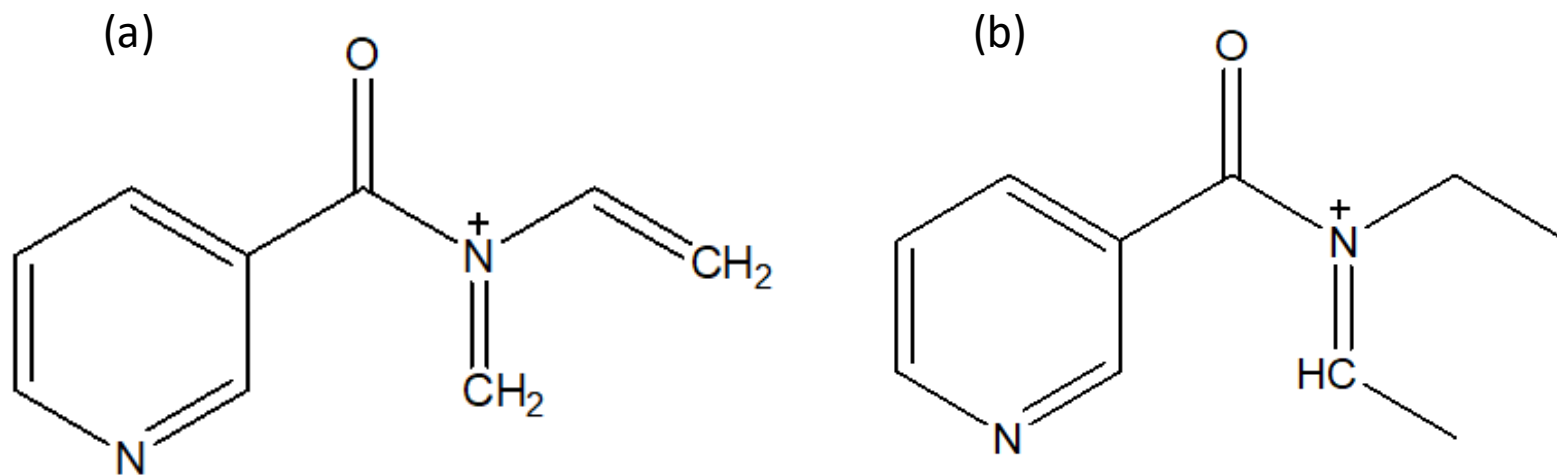

Supplementary Figure 3. Structure of the main ions of Nikethamide: a) ion  $[M-H]^+$  at  $m/z$  177 and (b) fragment ion  $[M-R]^+$  at  $m/z$  161.
